# Supplementary material
Source: MDPI journal article supplement (https://www.mdpi.com/2073-4344/8/11/494)
Supplement: s1 [file s1]

# Supplementary Materials: Reduction Process of Iron Catalyst Precursors for Ammonia Synthesis Doped with Lithium Oxide

Roman Jedrzejewski <sup>1</sup> and Zofia Lendzion-Bielun <sup>2,\*</sup>

<sup>1</sup> Institute of Materials Science and Engineering, West Pomeranian University of Technology, Szczecin, al. Piastów 19, 70-310 Szczecin, Poland; zosi@zut.edu.pl

<sup>2</sup> Institute of Inorganic Chemical and Environment Engineering, Faculty of Chemical Technology and Engineering, West Pomeranian University of Technology, Szczecin, ul. Pułaskiego 10, 70-322 Szczecin, Poland

\* Correspondence: zosi@zut.edu.pl

Received: 20 September 2018; Accepted: 16 October 2018; Published: date

The reduction of the industrial catalyst precursor KAT-K<sub>2</sub>O was examined in-situ under isothermal conditions at a temperature of  $t=470$  °C. Results are shown in (Figures S1,S2).

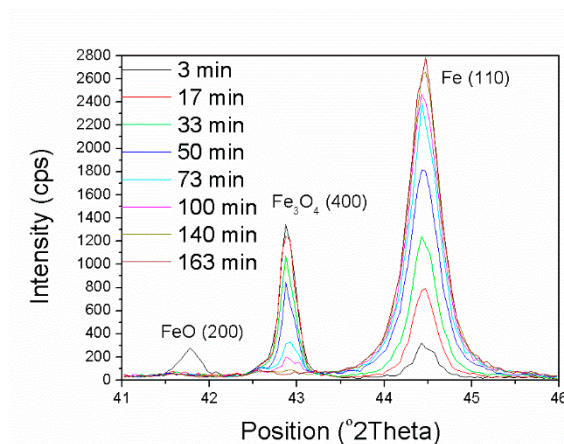

**Figure S1.** Demonstration X-ray patterns of the industrial catalyst precursor KAT-K<sub>2</sub>O taken after various reduction times at a temperature of 470 °C.

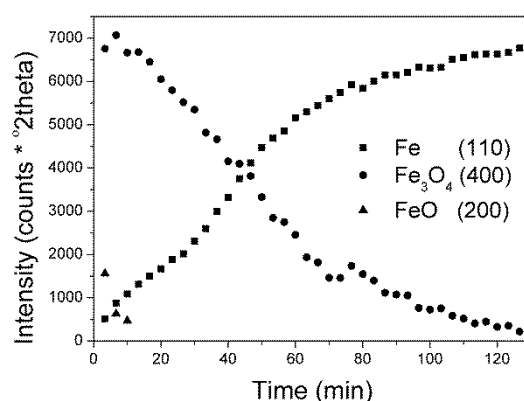

**Figure S2.** Dependence of peak intensities of Fe<sub>3</sub>O<sub>4</sub>, FeO, and Fe on the reduction time for the industrial catalyst precursor KAT-K<sub>2</sub>O ( $T=470$  °C). For better view the peak intensity of Fe phase was divided by 4.

In demonstration X-ray patterns, (Figure 1), the shift of  $\text{Fe}_3\text{O}_4$  peaks are not noticeable. After the reduction process, only peaks belonging to the  $\text{CaFe}_3\text{O}_5$  were detected. That phase does not undergo the full reduction.

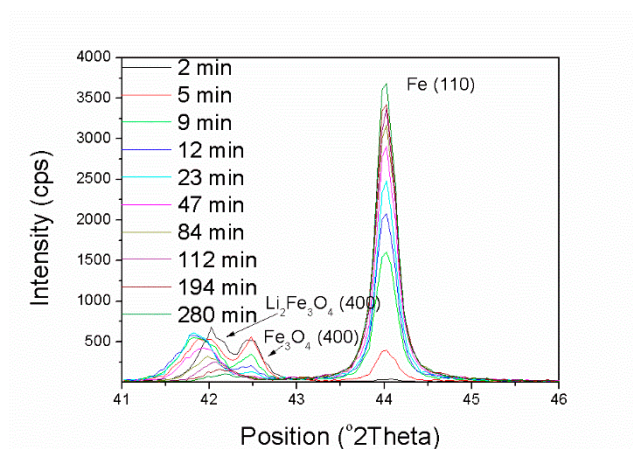

**Figure S3.** X-ray patterns taken after various times of KAT1-Li<sub>2</sub>O catalyst precursor reduction at a temperature of 520 °C.

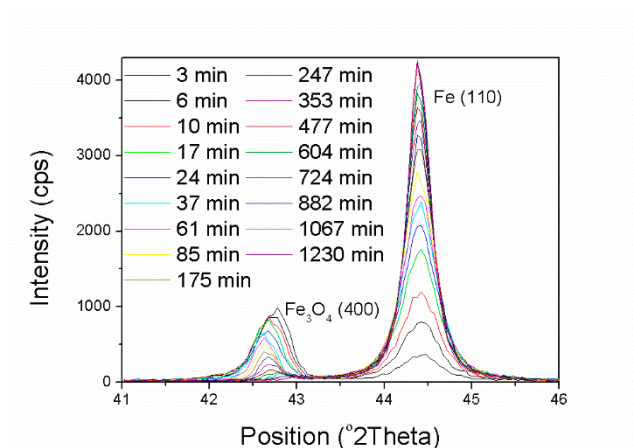

**Figure S4.** X-ray patterns of the KAT2-Li<sub>2</sub>O catalyst after various time of the reduction at 520 °C.

In the early stage of the KAT2-Li<sub>2</sub>O precursor reduction, asymmetry of the  $\text{Fe}_3\text{O}_4$  phase peak, from a side of lower angles, is visible, which may suggest the occurrence of an additional phase (Figure 4).

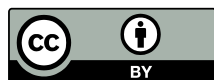

© 2018 by the authors. Submitted for possible open access publication under the terms and conditions of the Creative Commons Attribution (CC BY) license (<http://creativecommons.org/licenses/by/4.0/>).
